# Supplementary material for: A ZIF-derived hollow carbon nanoframework loaded with FeCu alloy nanoparticles for efficient oxygen reduction reaction and zinc–air batteries
Source: Royal Society of Chemistry journal article supplement (doi:10.1039/d3ta08038b), 2024-01-01
Supplement: d3ta08038b1.pdf [file d3ta08038b1.pdf]

## Supporting Information

### **ZIF-Derived Hollow Carbon Nanoframework Loaded with FeCu Alloy Nanoparticles for Efficient Oxygen Reduction Reaction and Zinc-Air Batteries**

*Guangxu Bao,<sup>a</sup> Yaxin Jin,<sup>a</sup> Qun Fan,<sup>a</sup> Xiaoyi Chen,<sup>\*a, b</sup> Xiao Wang,<sup>c</sup> Tianxiang Yan<sup>a</sup>, Haoyuan Chi,<sup>a</sup> Jianlong Lin,<sup>a</sup> Wenquan Cui,<sup>c</sup> and Sheng Zhang<sup>\*a</sup>*

<sup>a</sup> Key Laboratory for Green Chemical Technology of Ministry of Education, School of Chemical Engineering and Technology, Tianjin University, Tianjin 300072, China.

<sup>b</sup> China Tianchen Engineering Co, Ltd., Tianjin, 300400, China

<sup>c</sup> College of Chemical Engineering, Hebei Key Laboratory for Environment Photocatalytic and Electrocatalytic Materials, North China University of Science and Technology, Tangshan 063210, China.

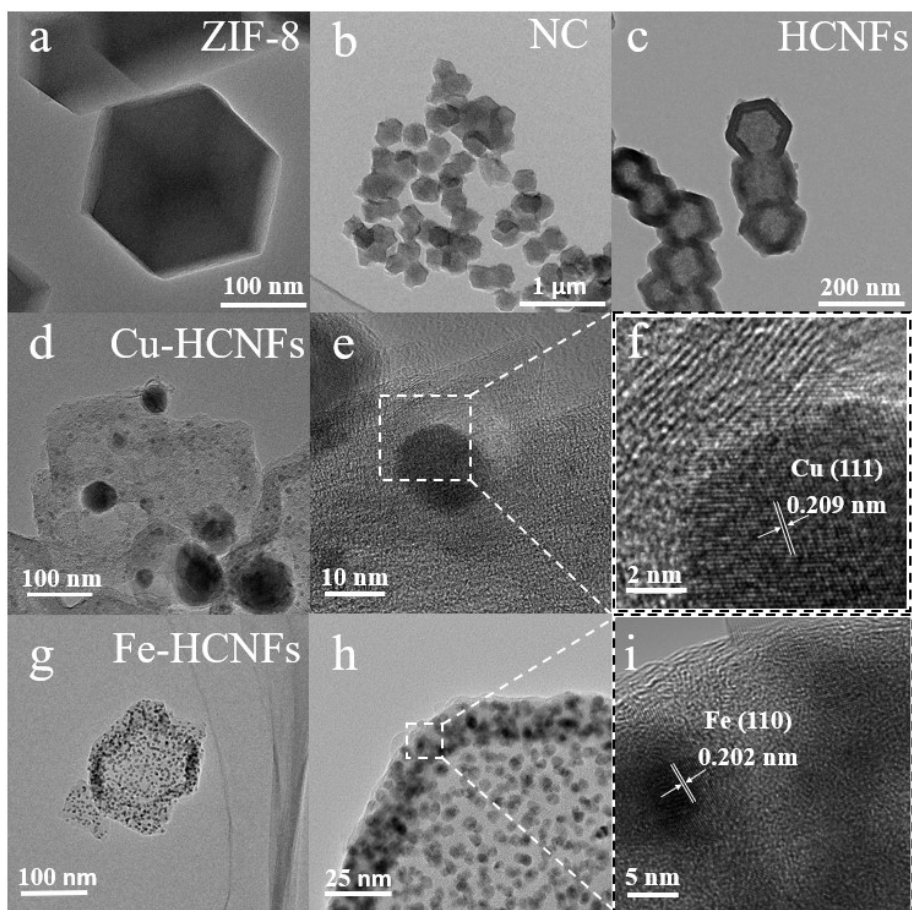

**Fig. S1** TEM image of (a) ZIF-8, (b) NC, (c) HCNFs, (d, e) Cu-HCNFs, (g, h) Fe-HCNFs HR-TEM image of (f) Cu particles on Cu-HCNFs, (i) Fe particles on Fe-HCNFs.

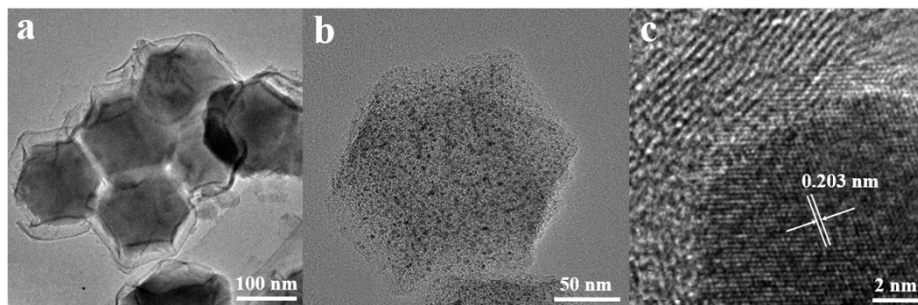

**Fig. S2** TEM image of (a) ZIF-8@TA, (b) FeCu-NC, (c) HR-TEM of FeCu alloy particles on FeCu-NC.

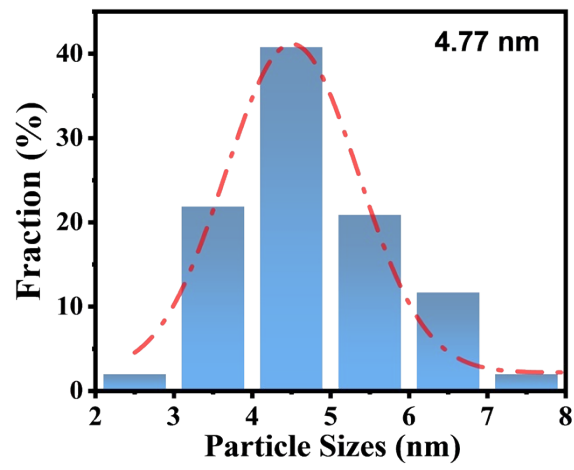

**Fig. S3** Particle size distribution plot of FeCu alloy nanoparticles on FeCu-HCNFs.

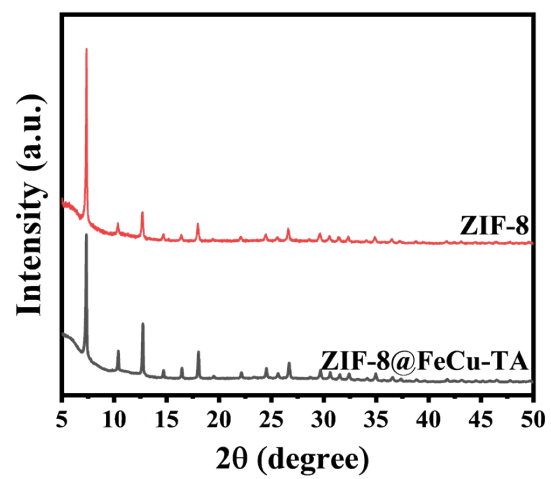

**Fig. S4** XRD pattern of ZIF-8 and ZIF-8@FeCu-TA.

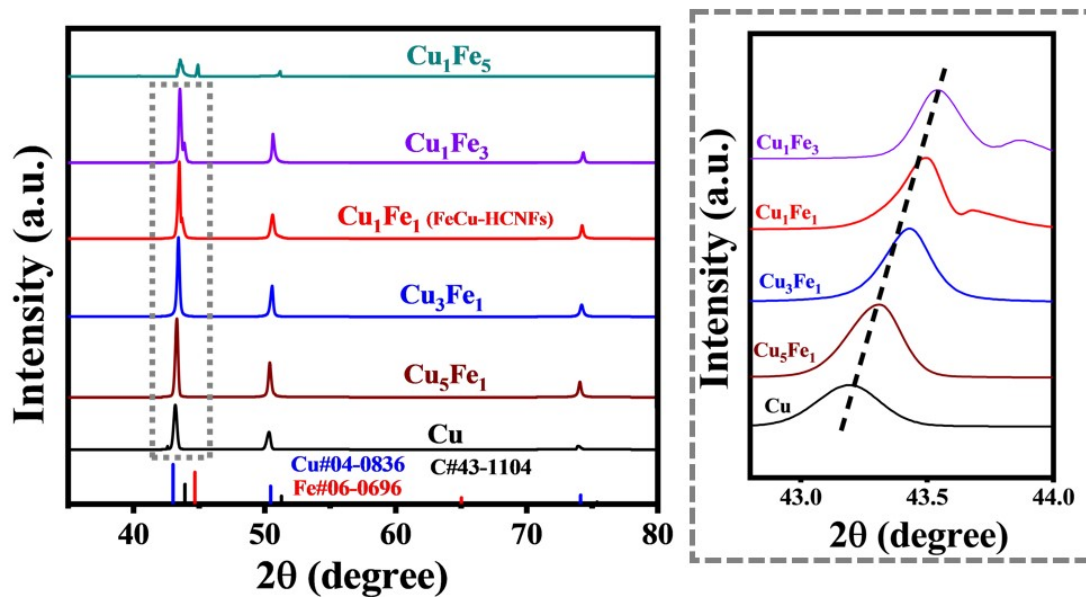

**Fig. S5** Rietveld refinement XRD pattern of Cu-HCNFs (black), FeCu-HCNFs with a ratio of Cu to Fe = 5:1 ( $\text{Cu}_5\text{Fe}_1$ , brown), 3:1 ( $\text{Cu}_3\text{Fe}_1$ , blue), 1:1 ( $\text{Cu}_1\text{Fe}_1$ , red), 1:3 ( $\text{Cu}_1\text{Fe}_3$ , purple), 1:5 ( $\text{Cu}_1\text{Fe}_5$ , green).

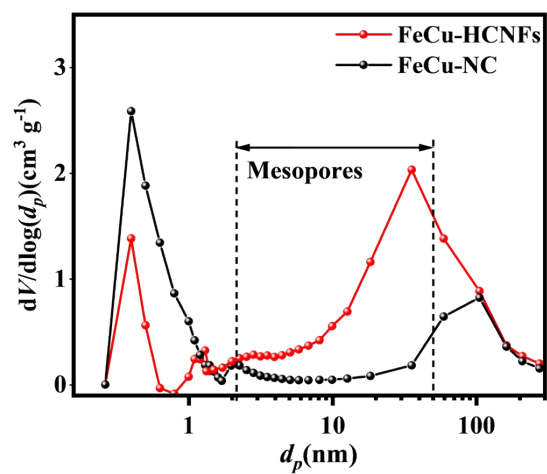

**Fig. S6** Pore size distribution plots of FeCu-HCNFs and FeCu-NC.

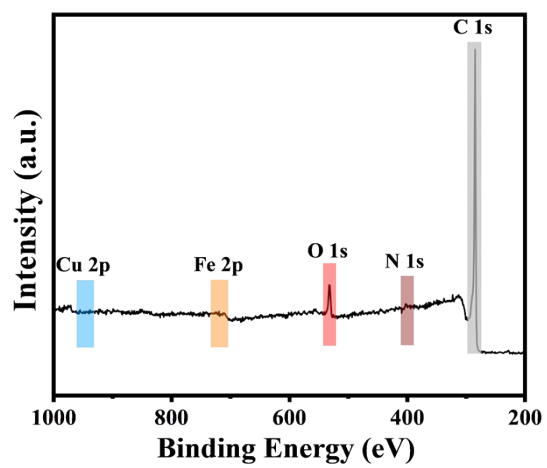

**Fig. S7** XPS survey of FeCu-HCNFs.



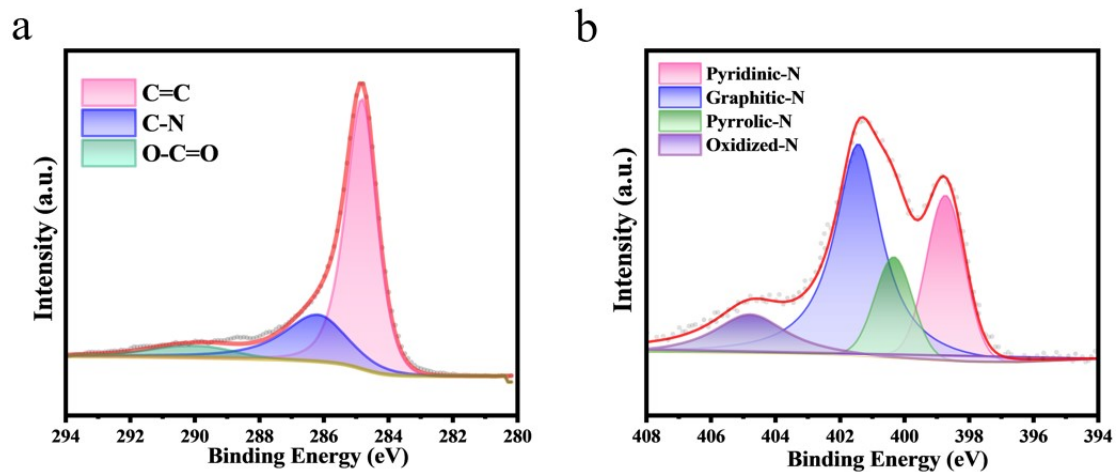

**Fig. S8** (a) C 1s and (b) N 1s high-resolution spectrum of FeCu-HCNFs.

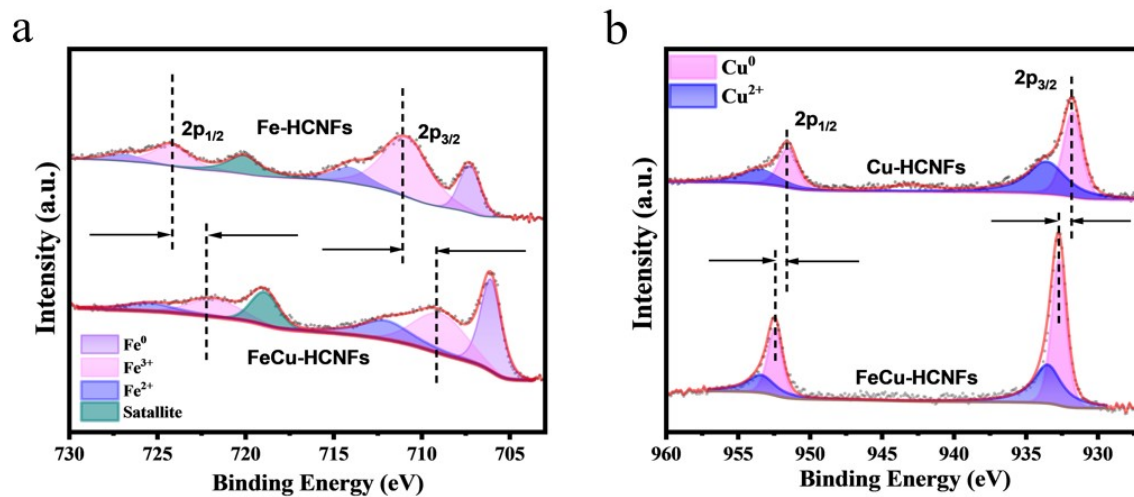

**Fig. S9** (a) Cu 2p XPS high-resolution spectrum of Cu-HCNFs and FeCu-HCNFs. and (b) Fe 2p high-resolution spectrum of Fe-HCNFs and FeCu-HCNFs.

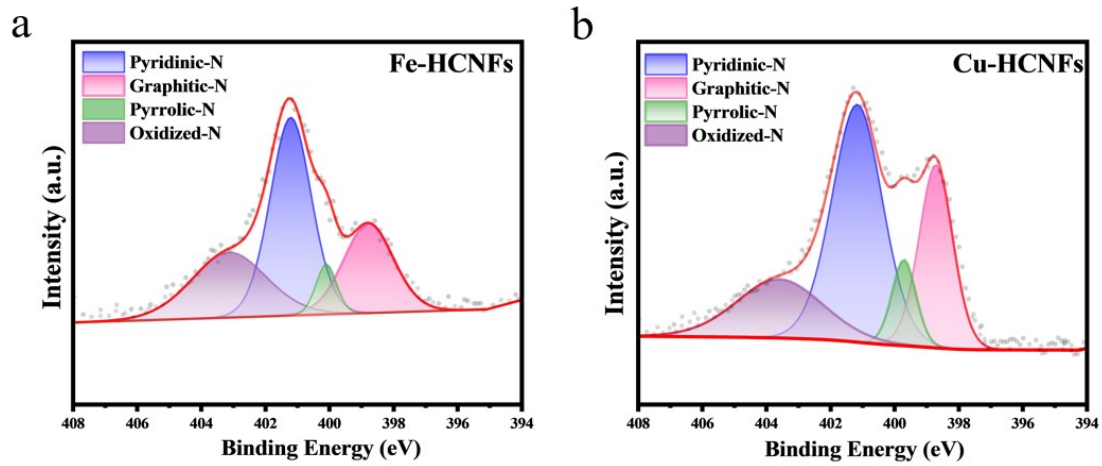

**Fig. S10** N 1s high-resolution spectrum of (a) Fe-HCNFs and (b) Cu-HCNFs.

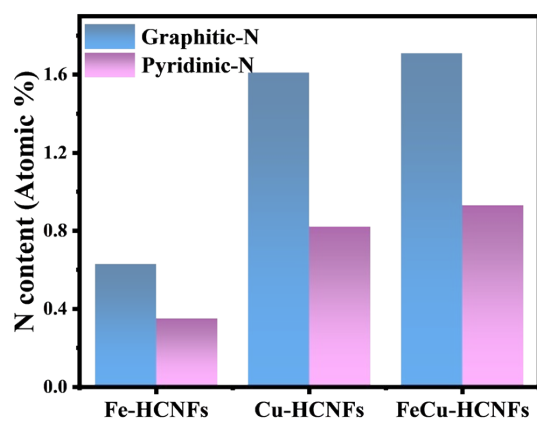

**Fig. S11** The comparison of surface graphitic N (red) and pyridinic N (black) content of Fe-HCNFs, Cu-HCNFs and FeCu-HCNFs.

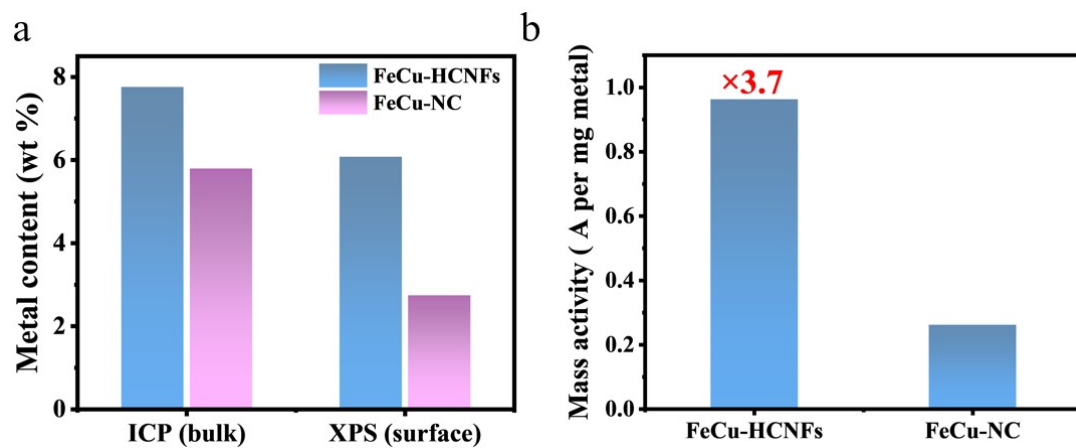

**Fig. S12** (a) The comparison of metal content in FeCu-HCNFs (blue) and FeCu-NC (pink) measured by ICP (Bulk content) and XPS (Surface content). (b) The mass activity of FeCu-HCNFs and FeCu-NC.

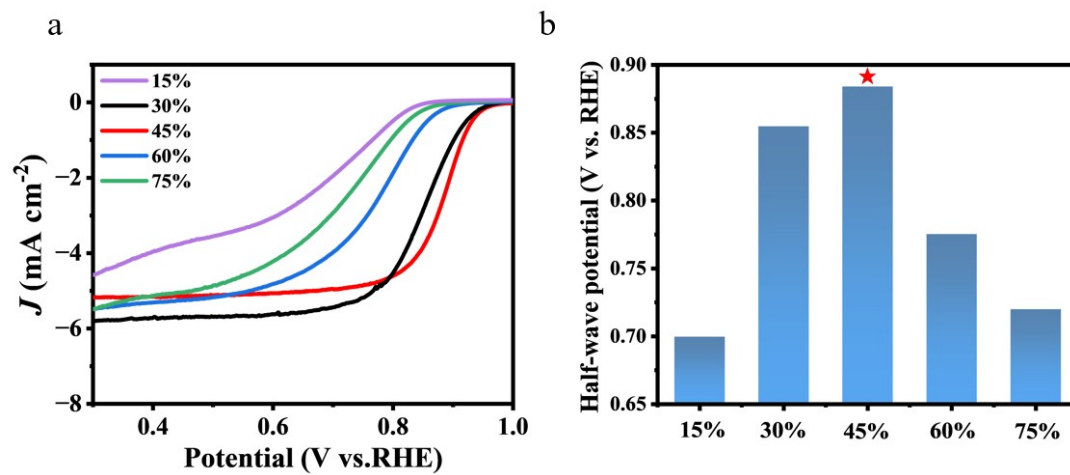

**Fig. S13** (a) LSV curves of catalysts with different impregnation ratio and corresponding (b) comparison of half wave potentials.

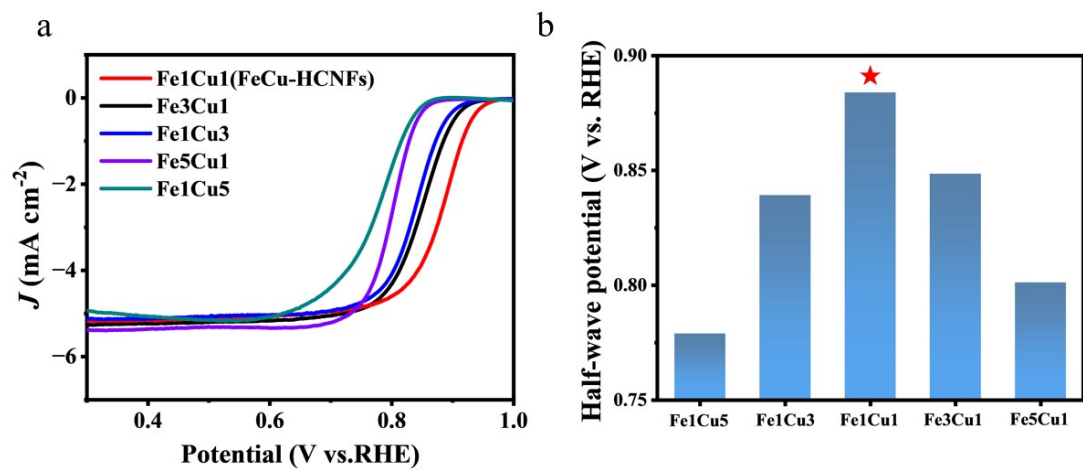

**Fig. S14** (a) LSV curves of catalysts with different Fe/Cu ratios and corresponding (b) comparison of half-wave potentials.

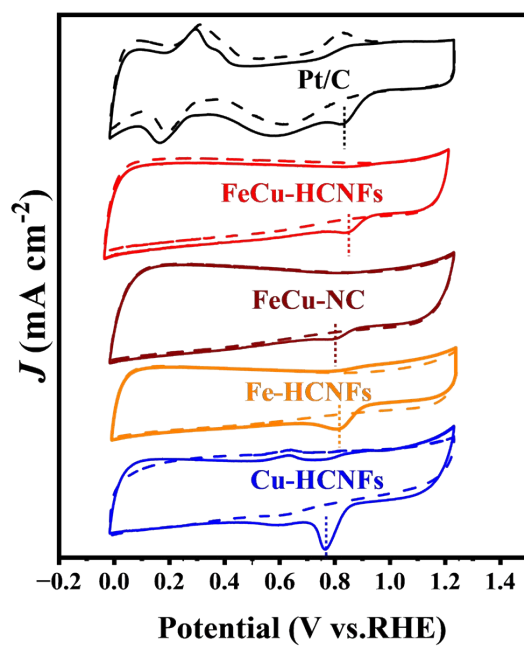

**Fig. S15** CV curves of FeCu-HCNFs, TKK-Pt/C, FeCu-NC, Fe-HCNFs, Cu-HCNFs in Ar (dash lines) and  $\text{O}_2$  (solid lines) saturated alkaline solutions with a scan rate of 50  $\text{mV s}^{-1}$ .



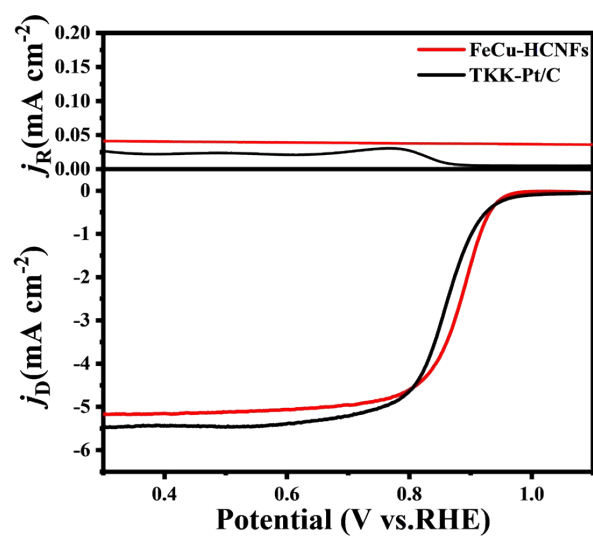

**Fig. S16** RRDE voltammograms of FeCu-HCNFs and Pt/C.

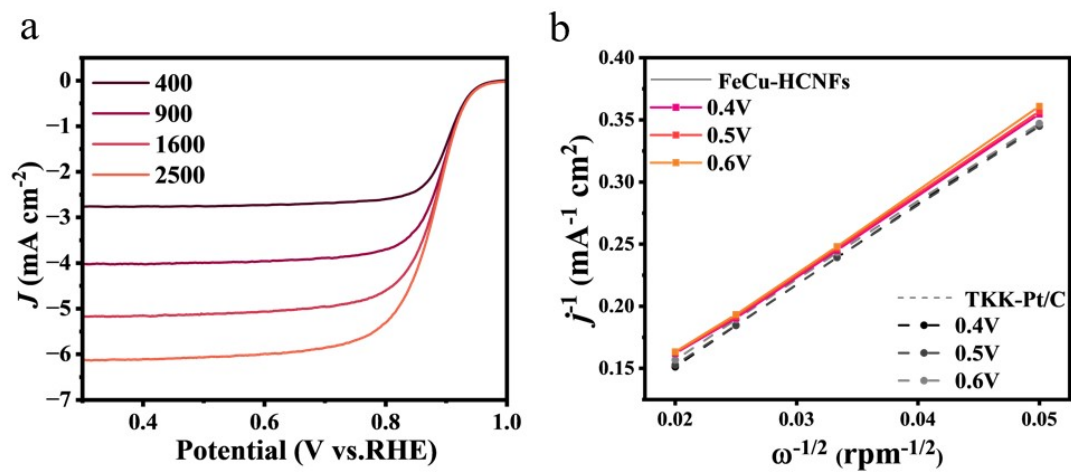

**Fig. S17** (a) LSV curves of FeCu-HCNFs at different rotation speeds and (b) corresponding K-L plots of FeCu-HCNFs and Pt/C in 0.1 M KOH.

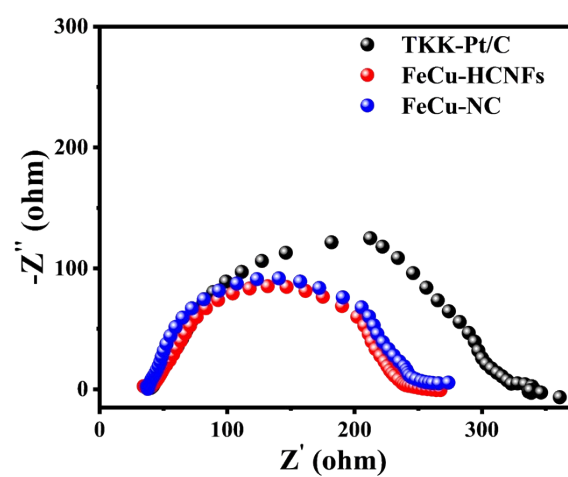

**Fig. S18** Impedance data of FeCu-HCNFs, FeCu-NC and Pt/C.

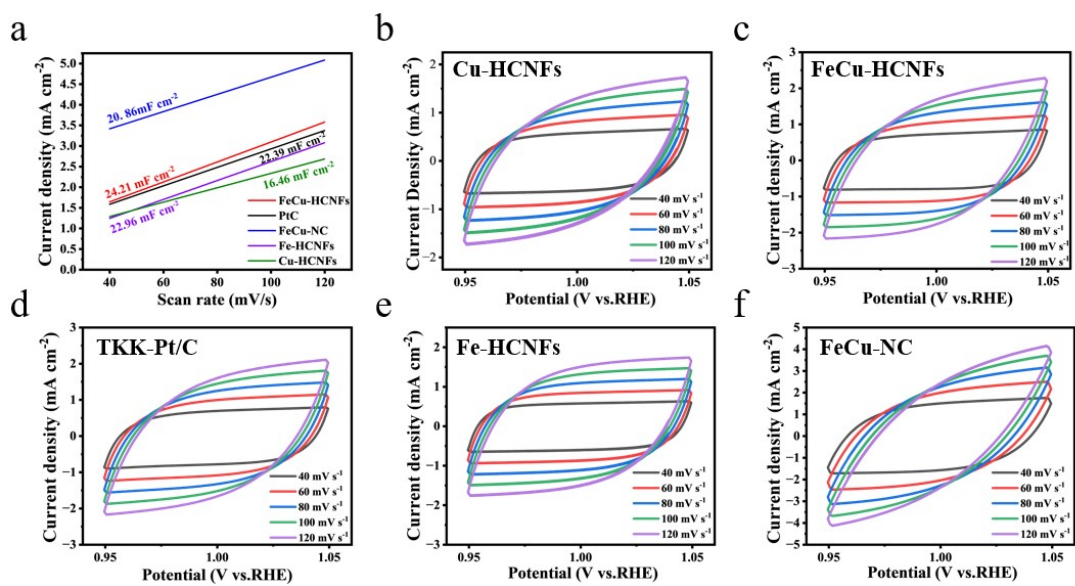

**Fig. S19** (a) Calculated  $C_{dl}$  by plotting the current density difference against the scan rate. CV curves of (b) Cu-HCNFs, (c) FeCu-HCNFs, (d) Pt/C, (e) Fe-HCNFs and (f) FeCu-NC.

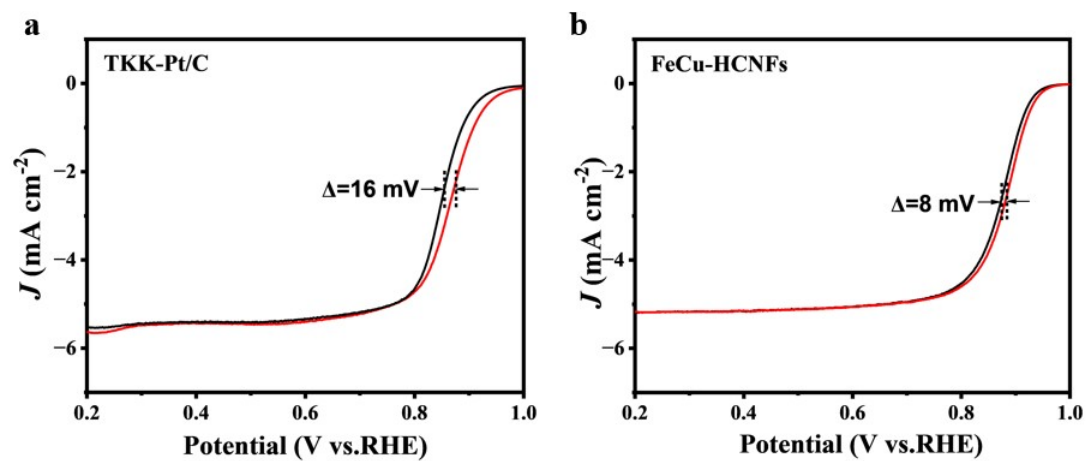

**Fig. S20** LSV curves of (a) Pt/C and (b) FeCu-HCNFs before (red) and after (black) ADT (5000 cycles).

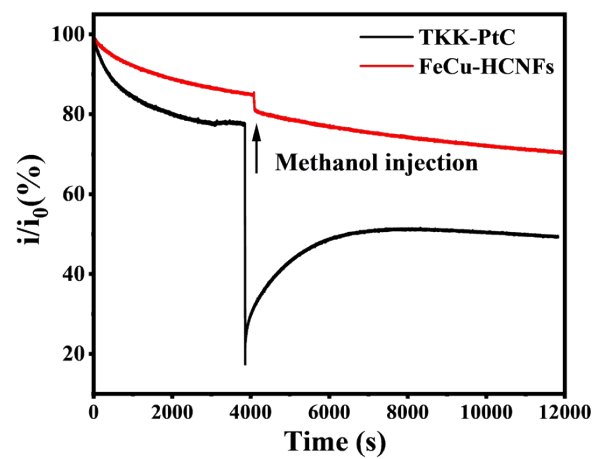

**Fig. S21** Methanol tolerance tests of FeCu-HCNFs and Pt/C.

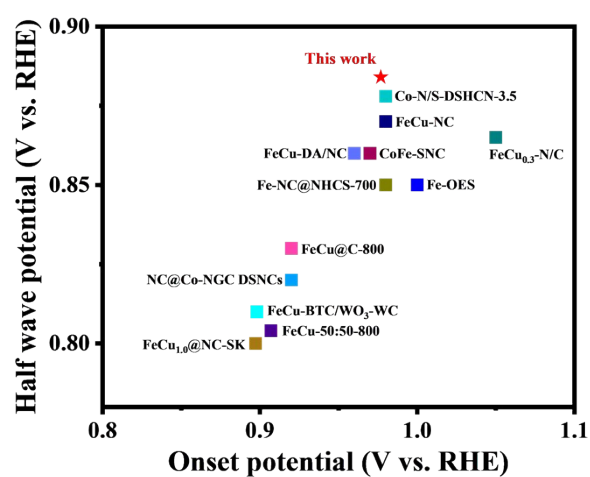

**Fig. S22** Comparisons of half-wave potential and onset potential between FeCu-HCNFs and other reported Fe/Cu-based or morphology engineering catalysts in alkaline media.

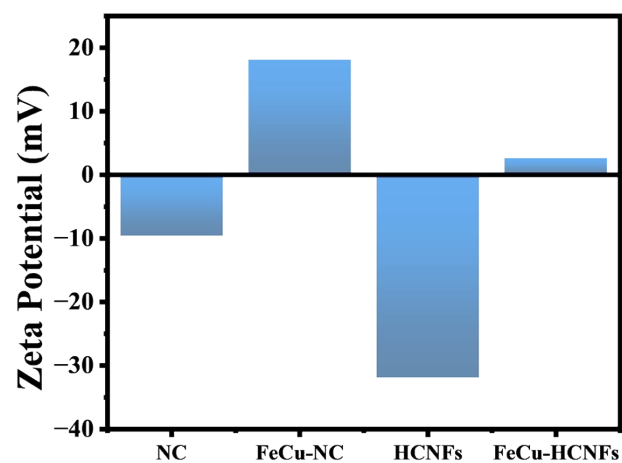

**Fig. S23** Comparison of Zeta potentials of NC, FeCu NC, HCNFs, and FeCu HCNFs.



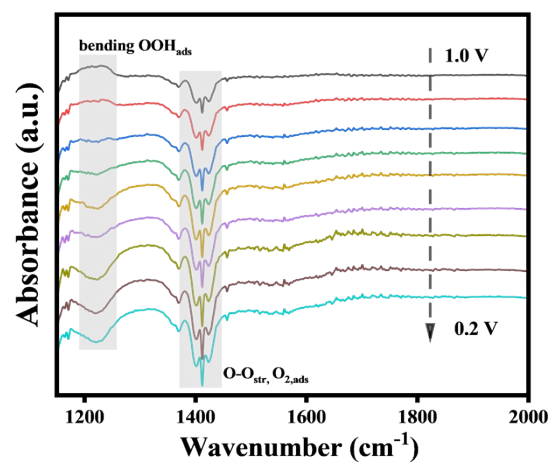

Fig. S24 In-situ infrared data of FeCu HCNFs materials with potential variation.

**Table S1.** Comparison of element composition and performance of catalysts with different proportions

| Samples                         | Composition (wt %) |        | Performance           |
|---------------------------------|--------------------|--------|-----------------------|
|                                 | Fe                 | Cu     | $E_{1/2}$ (V vs. RHE) |
| Fe <sub>5</sub> Cu <sub>1</sub> | 6.41 %             | 1.40 % | 0.801 V               |
| Fe <sub>3</sub> Cu <sub>1</sub> | 5.86 %             | 2.11 % | 0.849 V               |
| Fe <sub>1</sub> Cu <sub>1</sub> | 3.82 %             | 3.94 % | 0.884 V               |
| Fe <sub>1</sub> Cu <sub>3</sub> | 1.85 %             | 5.02%  | 0.840 V               |
| Fe <sub>1</sub> Cu <sub>5</sub> | 1.13 %             | 5.12%  | 0.778 V               |

**Table S2.** Comparisons of half-wave potential and onset potential between FeCu-HCNFs and other reported Fe/Cu-based or morphology engineering catalysts in alkaline media.

| Catalyst                                     | Media     | $E_{\text{onset}}$ (V vs. RHE) | $E_{1/2}$ (V vs. RHE) |
|----------------------------------------------|-----------|--------------------------------|-----------------------|
| FeCu-HCNFs                                   | 0.1 M KOH | 0.977                          | 0.884                 |
| FeCu-NC <sup>[1]</sup>                       | 0.1 M KOH | 0.98                           | 0.87                  |
| FeCu-DA/NC <sup>[2]</sup>                    | 0.1 M KOH | 0.96                           | 0.86                  |
| FeCu <sub>0.3</sub> -N/C <sup>[3]</sup>      | 0.1 M KOH | 1.05                           | 0.865                 |
| Co-N/S-DSHCN-3.5 <sup>[4]</sup>              | 0.1 M KOH | 0.98                           | 0.878                 |
| Fe-OES <sup>[5]</sup>                        | 0.1 M KOH | 1.00                           | 0.85                  |
| Fe-NC@NHCS-700 <sup>[6]</sup>                | 0.1 M KOH | 0.98                           | 0.85                  |
| CoFe-SNC <sup>[7]</sup>                      | 0.1 M KOH | 0.97                           | 0.86                  |
| FeCu@C-800 <sup>[8]</sup>                    | 0.1 M KOH | 0.92                           | 0.83                  |
| NC@Co-NGC DSNCs <sup>[9]</sup>               | 0.1 M KOH | 0.92                           | 0.82                  |
| FeCu-BTC/WO <sub>3</sub> -WC <sup>[10]</sup> | 0.1 M KOH | 0.898                          | 0.81                  |
| FeCu-50:50-800 <sup>[11]</sup>               | 0.1 M KOH | 0.907                          | 0.804                 |
| FeCu <sub>1.0</sub> @NC-SK <sup>[12]</sup>   | 0.1 M KOH | 0.897                          | 0.80                  |

## Reference

- 1 X. Zhou, K. Song, Y. Feng, C. Jiang, Z. Chen, Z. Wang, N. Yue, X. Ge, W. Zhang, W. Zheng, *Nano Res.* **2023**, 16, 4634.
- 2 C. Du, Y. Gao, H. Chen, P. Li, S. Zhu, J. Wang, Q. He, W. Chen, *J. Mater. Chem. A* **2020**, 8, 16994.
- 3 B. Wang, L. Xu, G. Liu, Y. Ye, Y. Quan, C. Wang, W. Wei, W. Zhu, C. Xu, H. Li, J. Xia, *J. Alloys Compd.* **2020**, 826, 154152.
- 4 T. Wang, C. Yang, Y. Liu, M. Yang, X. Li, Y. He, H. Li, H. Chen, Z. Lin, *Nano Lett.* **2020**, 20, 5639.
- 5 C. C. Hou, L. Zou, L. Sun, K. Zhang, Z. Liu, Y. Li, C. Li, R. Zou, J. Yu, Q. Xu, *Angew. Chem. Int. Ed.* **2020**, 59, 7384.
- 6 Y. Wang, R. Yi, A. Chen, C. Fang, Y. Wang, Q. Yi, M. Liu, S. Liu, S. Zhan, B. Zhong, *Energy Technol.* **2022**, 10, 2200057.
- 7 C. C. Weng, J. T. Ren, H. Y. Wang, X. W. Lv, Y. J. Song, Y. S. Wang, L. Chen, W. W. Tian, Z. Y. Yuan, *Appl. Catal. B* **2022**, 307, 121190.
- 8 Y. Qiao, Y. Ni, F. Kong, R. Li, C. Zhang, A. Kong, Y. Shan, *Chemistry An Asian Journal* **2019**, 14, 2676.
- 9 S. Liu, Z. Wang, S. Zhou, F. Yu, M. Yu, C. Y. Chiang, W. Zhou, J. Zhao, J. Qiu, *Adv. Mater.* **2017**, 29, 1700874.
- 10 D. R. Paudel, U. N. Pan, R. B. Ghising, M. R. Kandel, S. Prabhakaran, D. H. Kim, N. H. Kim, J. H. Lee, *Appl. Catal. B* **2023**, 331, 122711.
- 11 J. S. M. Lee, Y. I. Fujiwara, S. Kitagawa, S. Horike, *Chem. Mater.* **2019**, 31, 4205.
- 12 X. Chen, R. Qin, Z. Li, S. Shan, Y. Liu, C. Yang, *Mol. Catal.* **2021**, 500, 111330.
